# Supplementary material for: Electrode engineering considerations for high energy efficiency Li–CO2 batteries
Source: Royal Society of Chemistry journal article supplement (doi:10.1039/d4se01582g), 2025-01-01
Supplement: d4se01582g1.pdf [file d4se01582g1.pdf]

## **Electrode engineering considerations for high energy efficiency Li-CO<sub>2</sub> batteries**

*Jingzhao Wang, Xin Chen, Xiangming Cui, Mi Zhou, Jianan Wang\*, Wenbiao Liu, Hang Ma, Jose Anguita, S. Ravi P. Silva, Kai Yang\*, Wei Yan*

J. Z. Wang, X. Chen, X. M. Cui, M. Zhou, Dr. J. N. Wang, Prof. W. Yan.

a. Department of Environmental Science and Engineering, State Key Laboratory of Multiphase Flow in Power Engineering, School of Energy and Power Engineering, Xi'an Jiaotong University, Xi'an 710049, China.

E-mail: wangjn116@xjtu.edu.cn

Dr J. Anguita, Prof. *S. R. P. Silva*, Dr. K. Yang

b. Advanced Technology Institute, University of Surrey, Guildford, Surrey GU2 7XH, UK.

E-mail: kai.yang@surrey.ac.uk

W. B. Liu, Dr. H. Ma

c. Center of Research & Development, Yunnan Yuntianhua Co., LTD, 1417 Dianchi Road, Kunming 650228, China

## Materials

Chloroplatinic acid hexahydrate ( $\text{H}_2\text{PtCl}_6 \cdot 6\text{H}_2\text{O}$ ) was obtained from Macklin. Few-layer graphene oxide powder (JCFRGO) and multi-walled carbon nanotube film (JCMWCFM 10 $\mu\text{m}$ ) were purchased from Jiakai Technology Co., Ltd. Single-walled carbon nanotubes suspension (TNWDIS, 0.2 wt.%) was purchased from Chengdu Organic Chemicals Co. Ltd. Polyacrylonitrile (PAN, average Mw = 150000) and N,N-dimethylformamide (DMF) was obtained from Sigma-Aldrich.

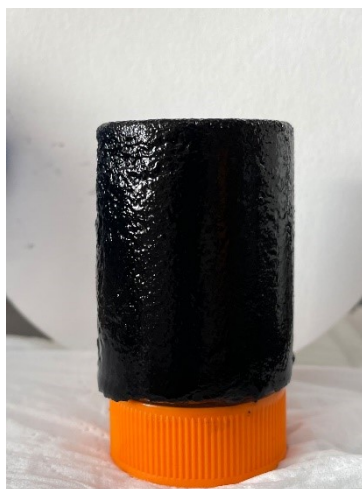

**Figure S1.** The photograph of hydrogel after hydrothermal treatment.

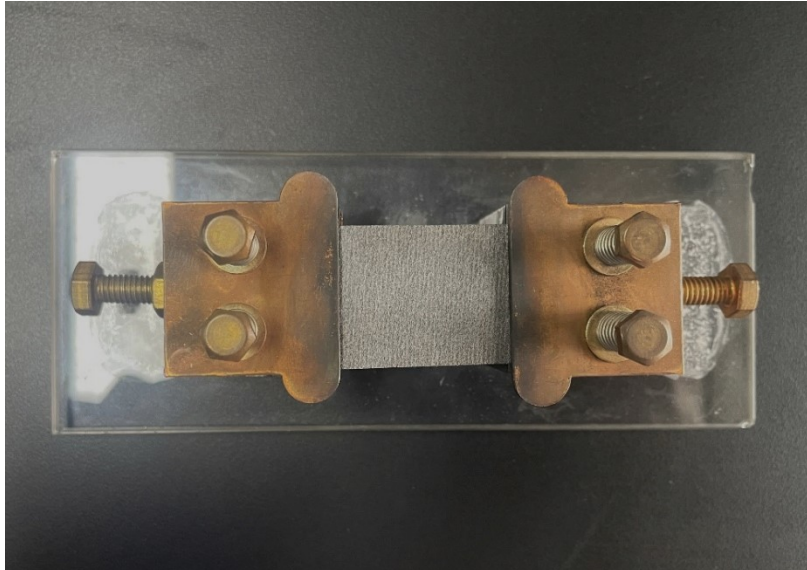

**Figure S2.** The photograph of the sample holder for Joule heating system.

**Table S1.** Comparison of key parameters for various substrate materials.

| <b>Substrates</b> | <b>Conductivity</b> | <b>Electrolyte wettability</b> | <b>Porous structure</b> | <b>Specific surface area</b> | <b>Mechanical strength</b> | <b>Preparation Difficulty</b> |
|-------------------|---------------------|--------------------------------|-------------------------|------------------------------|----------------------------|-------------------------------|
| GCA               | Relatively High     | Good                           | Hierarchical porosity   | Large                        | Relatively Strong          | Low                           |
| CNT               | High                | Relatively Good                | Single porosity         | Relatively large             | Strong                     | High                          |
| PAN-based CNF     | Relatively Low      | Relatively Good                | Single porosity         | Relatively small             | Relatively weak            | Relatively High               |

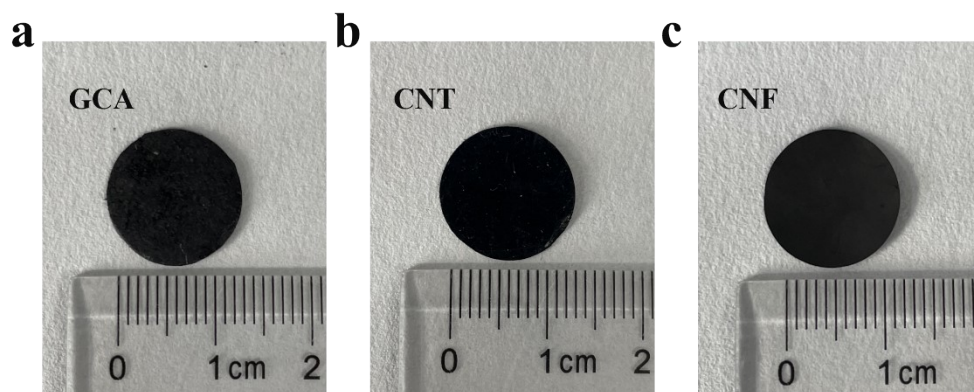

**Figure S3.** The photograph of the three substrates, the diameter of the electrode is 14 mm.

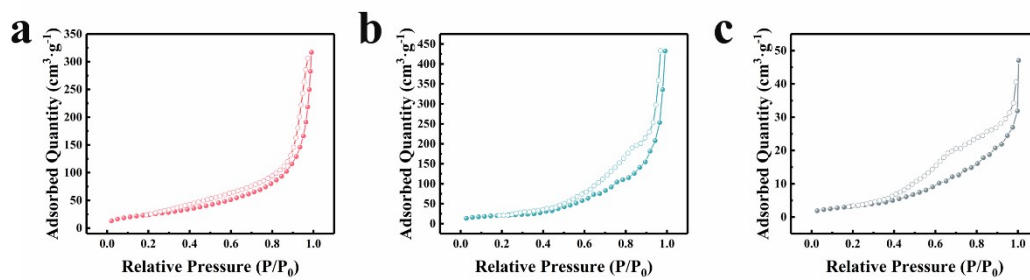

**Figure S4.** N<sub>2</sub> adsorption-desorption isotherms of (a) GCA, (b) CNT and (c) CNF.

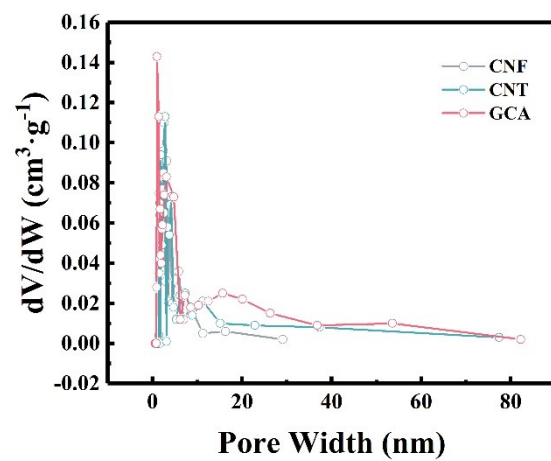

**Figure S5.** The pore distributions of three substrates based on Barrett–Joyner–Halenda method.



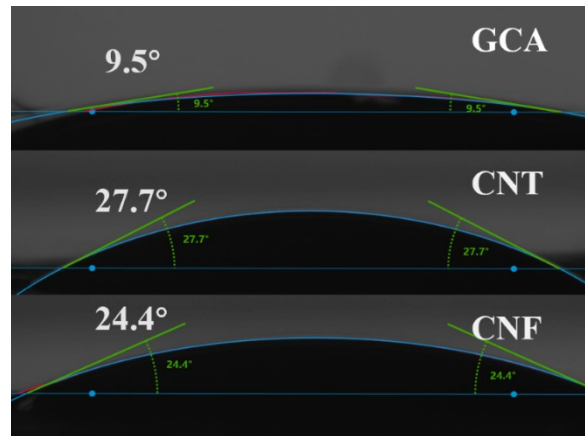

**Figure S6.** The contact angle test images of three substrates

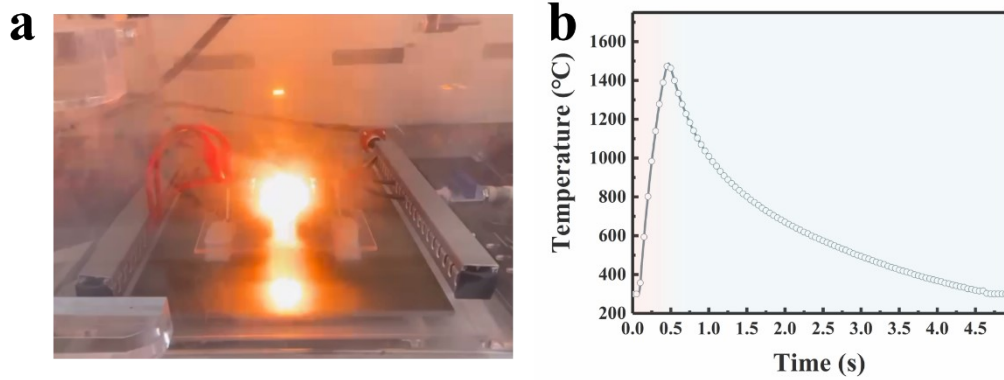

**Figure S7.** (a) The digital image and (b) the temperature-time curve during Joule-heating process.

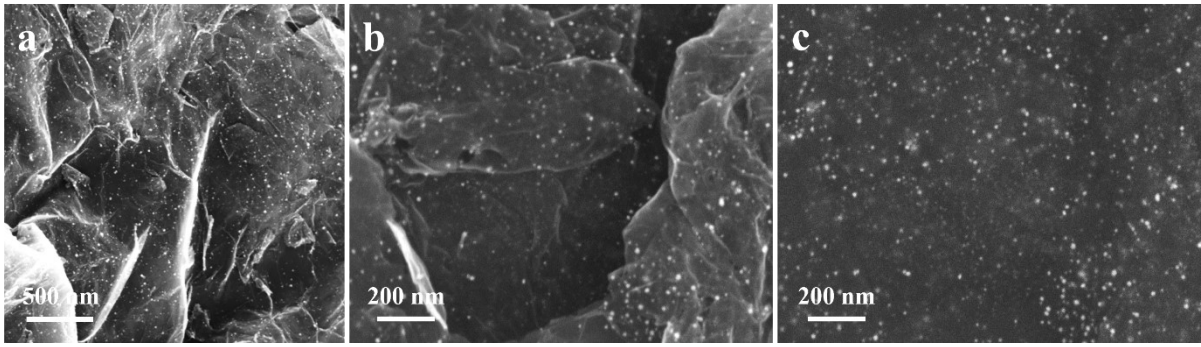

**Figure S8.** The SEM image of Pt@GCA in (a) and (b) InLens and (c) SE2 modes.

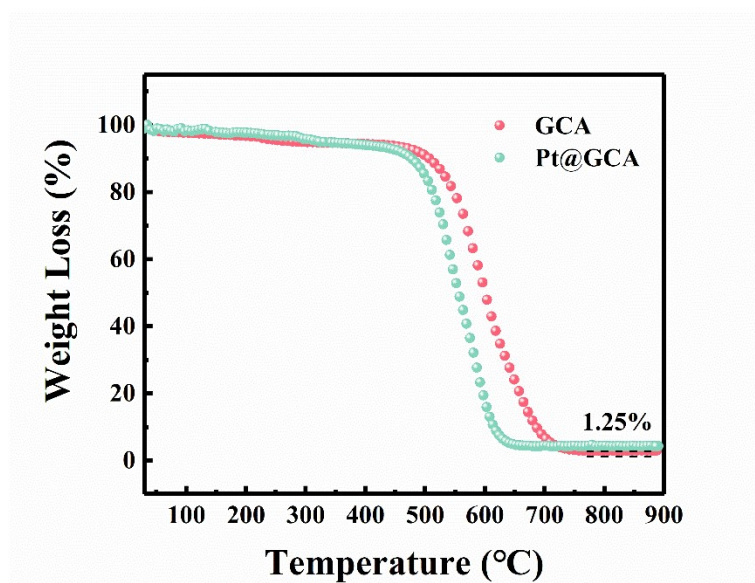

**Figure S9.** Thermogravimetry curves of GCA and Pt@GCA.

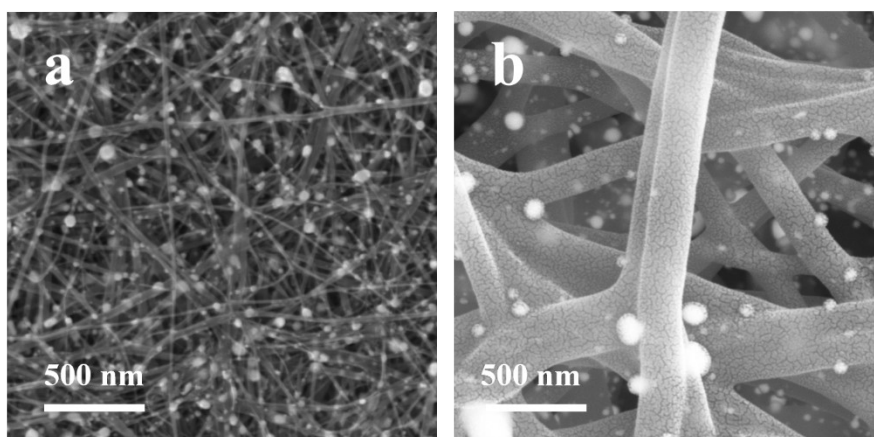

**Figure S10.** SEM images of (a) Pt@CNT and Pt@CNF electrodes.

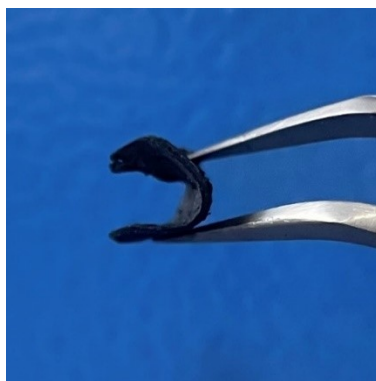

**Figure S11.** Flexibility test image of Pt@GCA electrode.

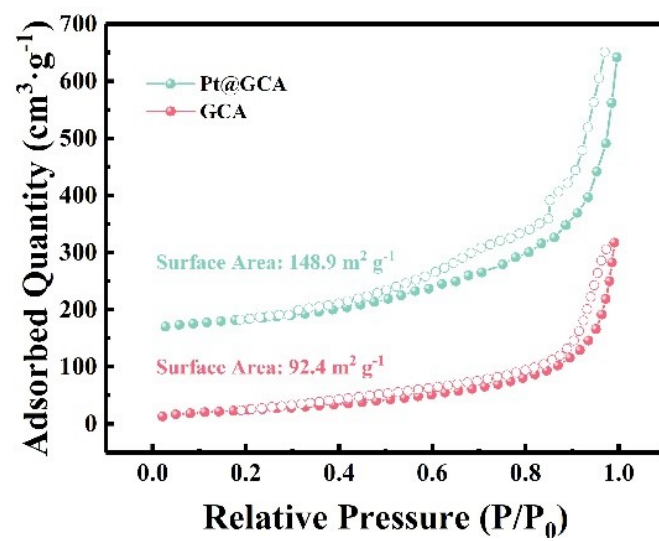

**Figure S12.** N<sub>2</sub> adsorption-desorption isotherms of Pt@GCA and GCA electrodes.

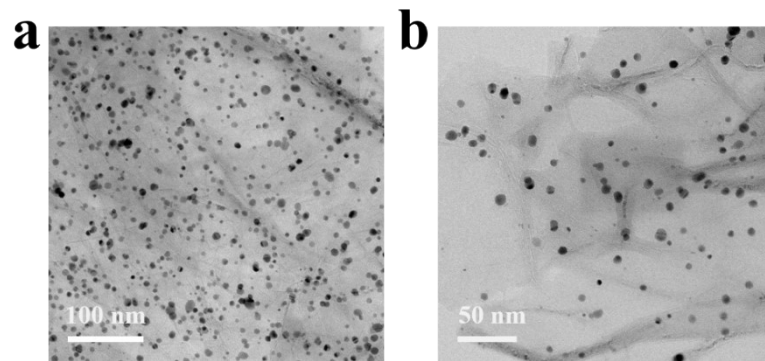

**Figure S13.** The TEM images of the Pt@GCA cathode with different resolutions.



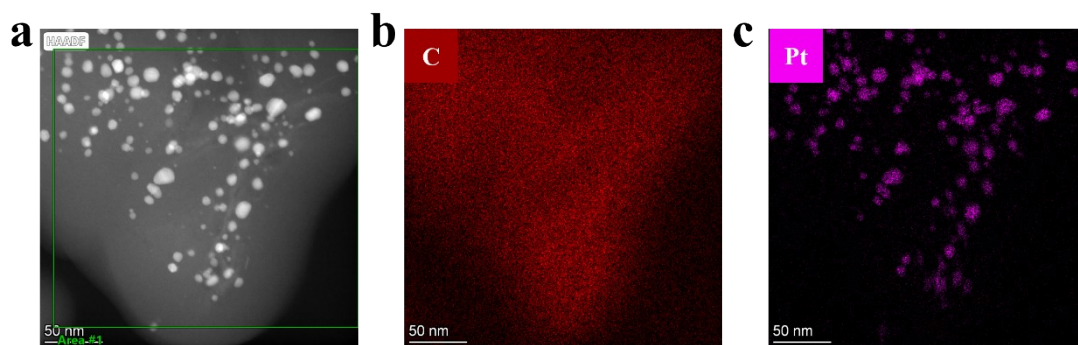

**Figure S14.** EDS element mappings of Pt@GCA.

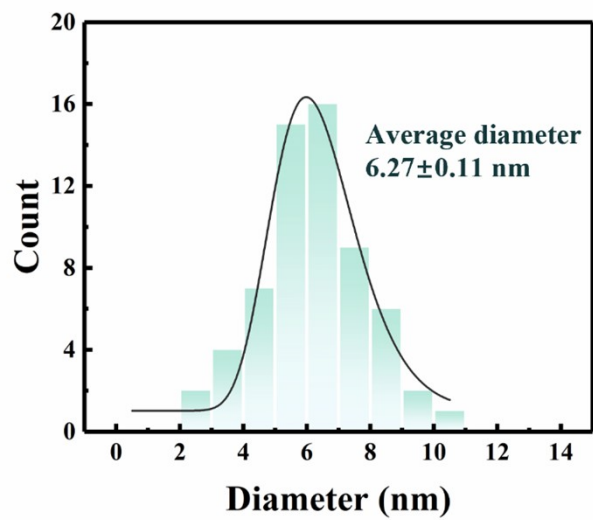

**Figure S15.** Pt NPs size distribution analysis based on **Figure S13b**.

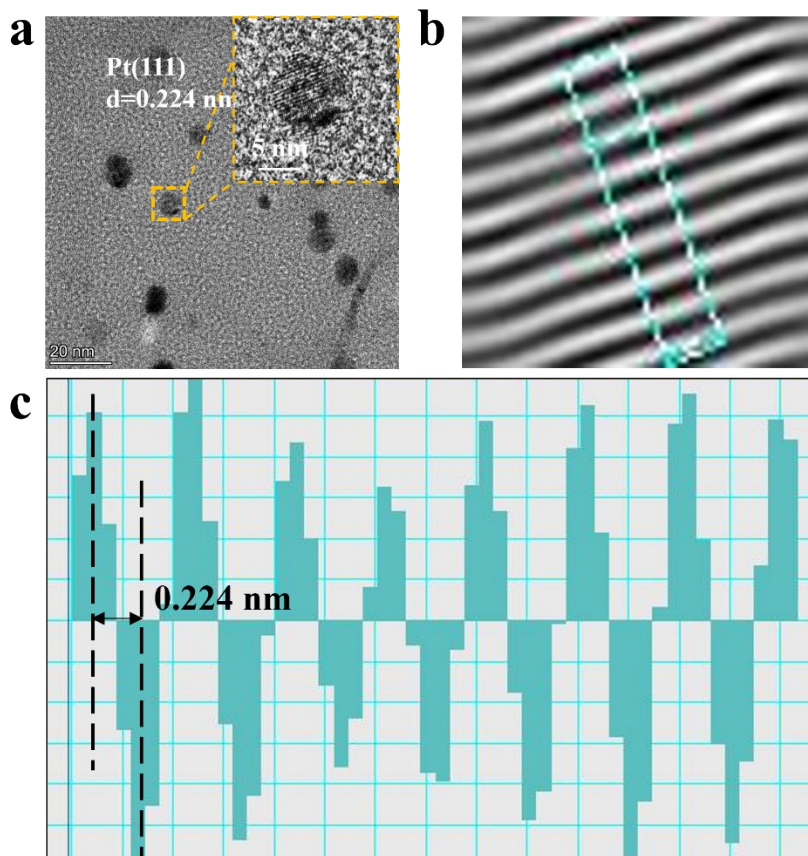

**Figure S16.** (a) The HRTEM images of the Pt@GCA, (b) the fast Fourier transform (FFT) image and (c) corresponding lattice size.

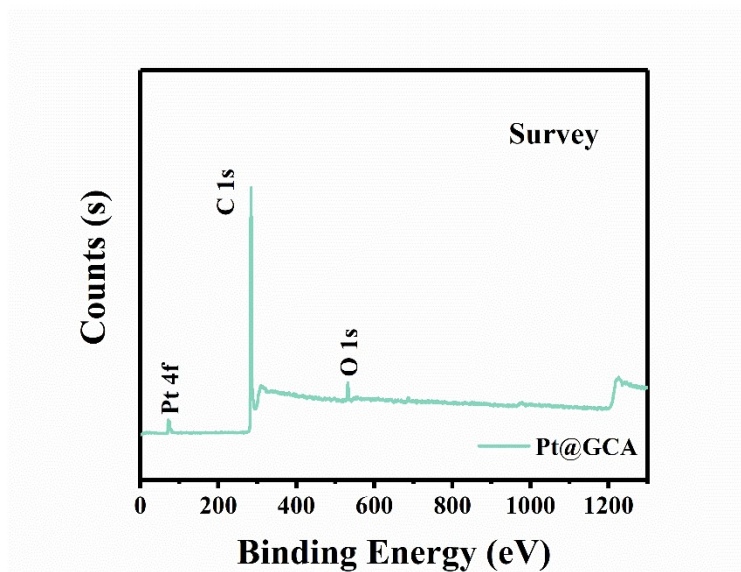

**Figure S17.** XPS survey of Pt@GCA electrode.

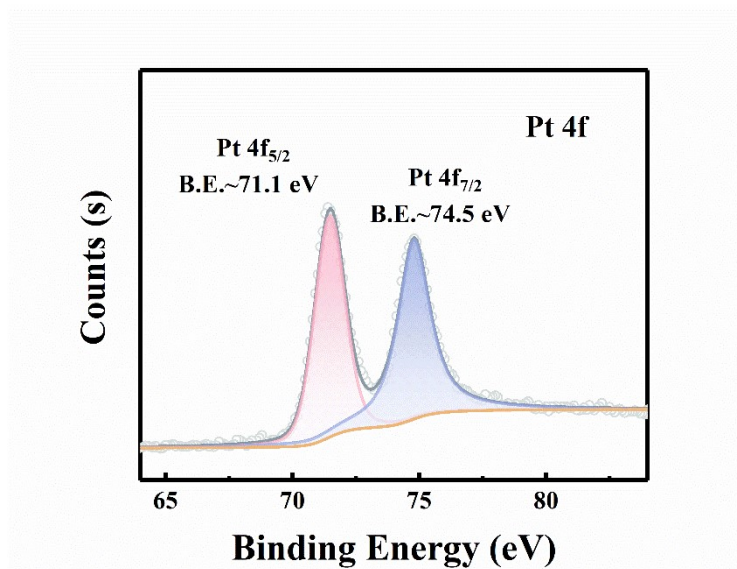

**Figure S18.** Refined Pt 4f XPS spectrum of Pt@GCA.

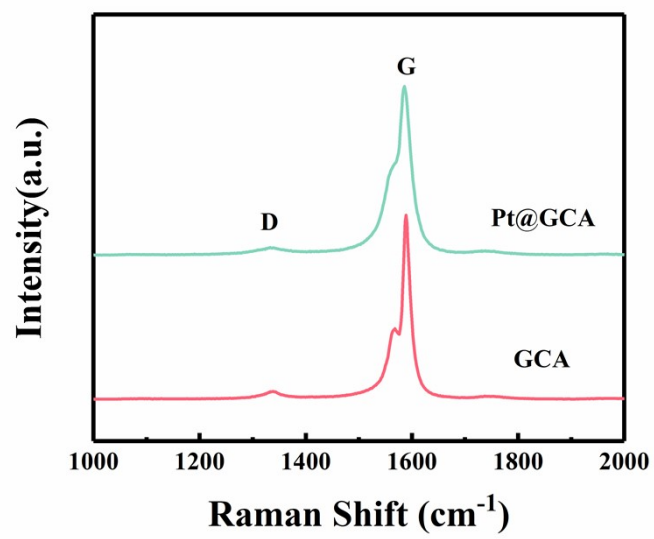

**Figure S19.** Raman spectra of GCA and Pt@GCA electrodes.

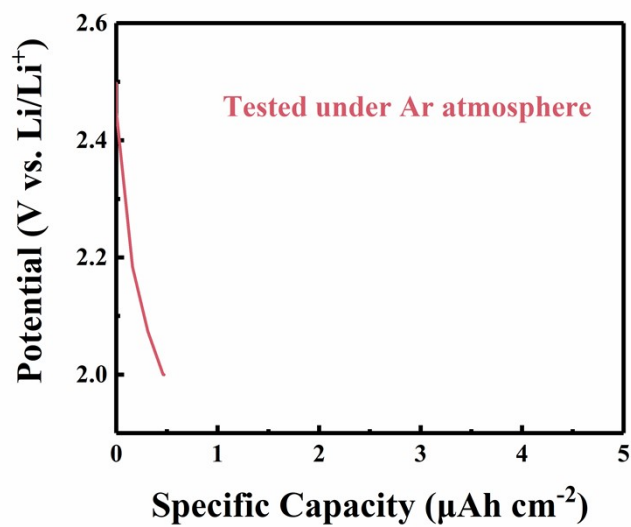

**Figure S20.** Full discharging test of Pt@GCA under Ar atmosphere, the current density is 20 μA cm<sup>-2</sup>.

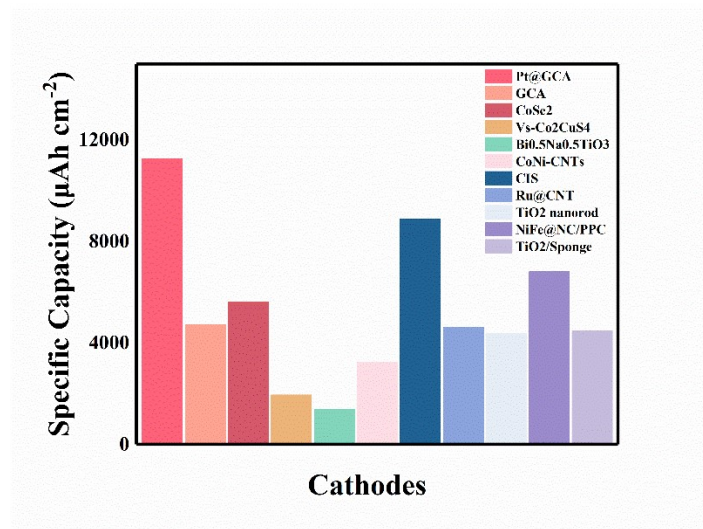

**Figure S21.** Areal discharging capacity comparison of different cathodes with reported LCBs.



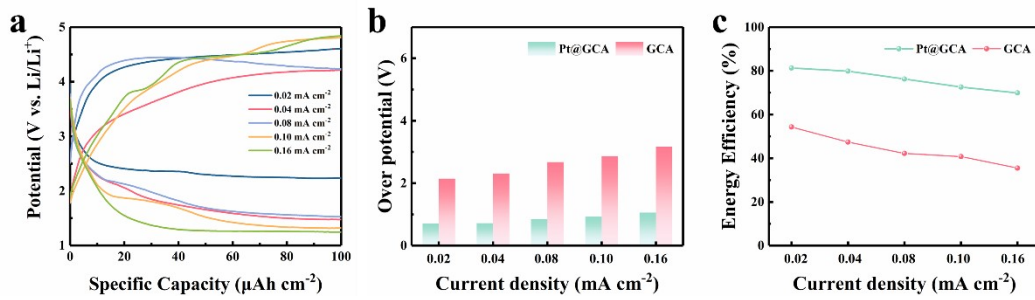

**Figure S22.** (a) Rate performance of GCA cathodes. (b) Overpotential and (c) energy efficiency of Pt@GCA and GCA under different current densities.

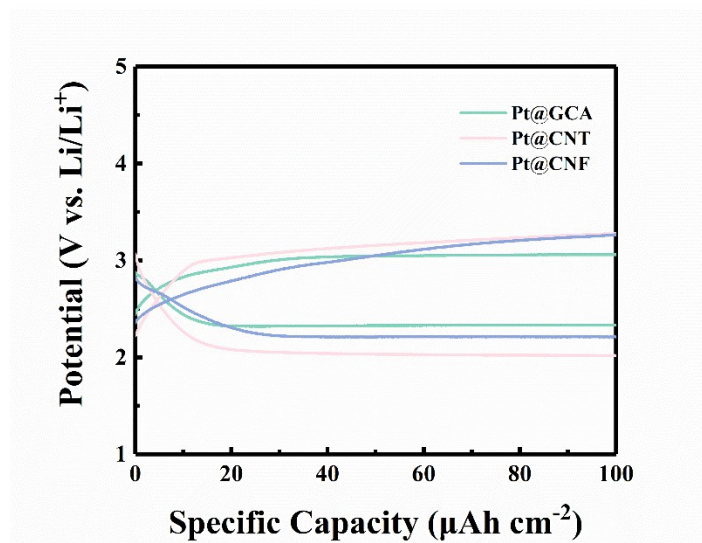

**Figure S23.** The discharge-charge profiles comparison of LCBs.

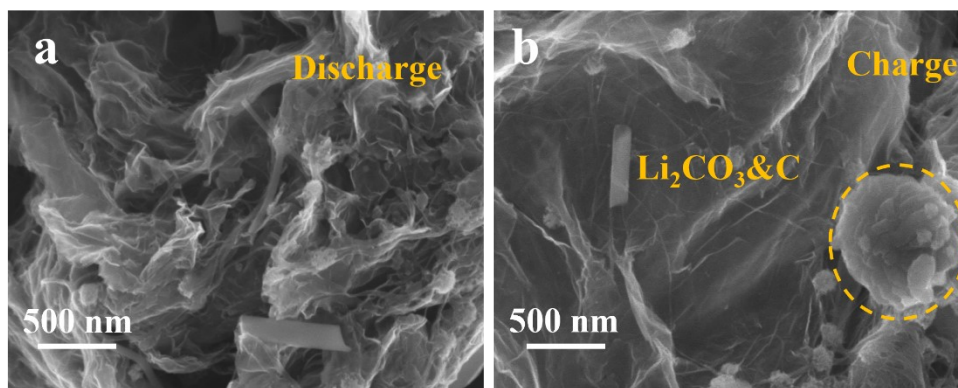

**Figure S24.** SEM observation of GCA cathode after discharging and charging process.

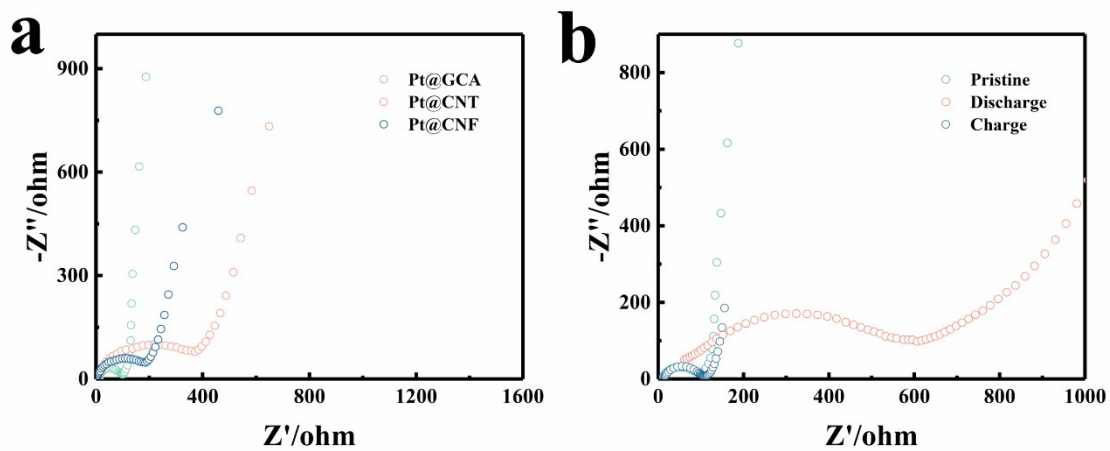

**Figure S25.** (a) EIS test of different cathodes before cycling. (b) Pt@GCA based LCBs at different cycling state.

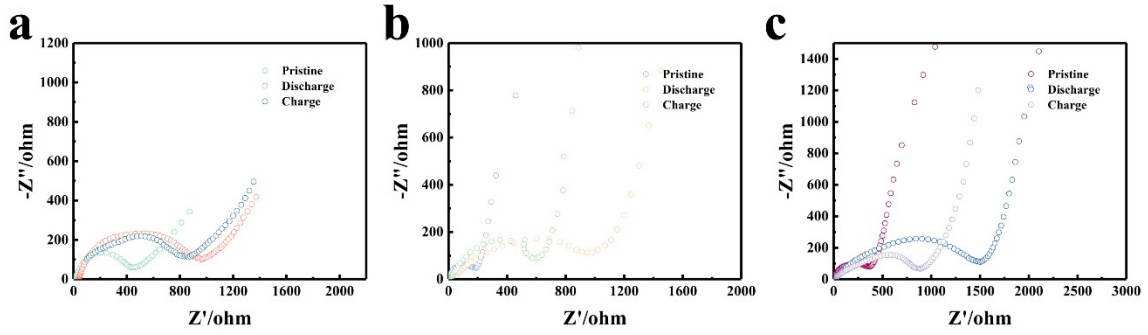

**Figure S26.** EIS test of (a) GCA, (b) Pt@CNF and (c) Pt@CNT after discharge/charge.

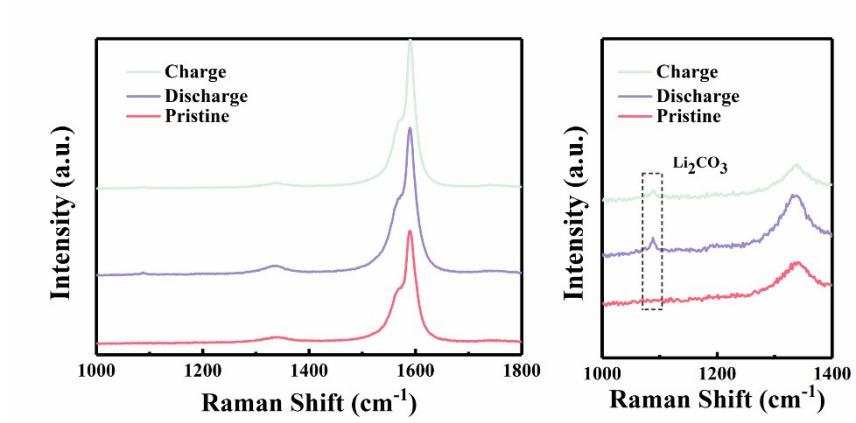

**Figure S27.** Raman spectra of GCA at different stages.

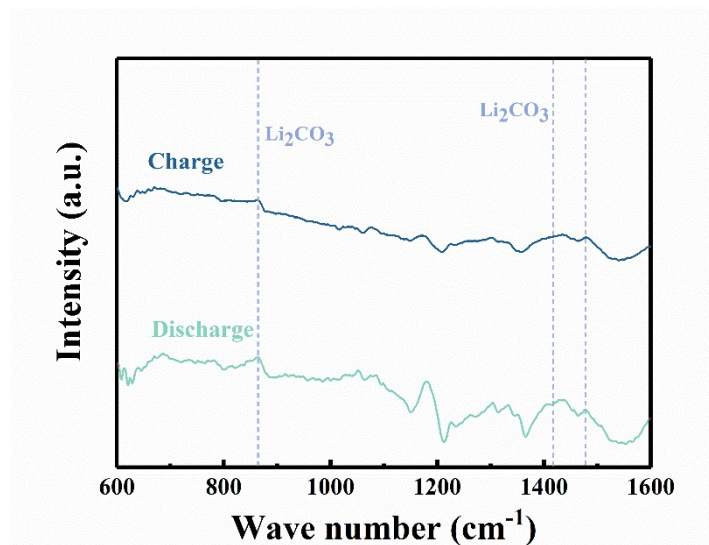

**Figure S28.** FTIR observation of Pt@GCA cathode after discharging and charging process.

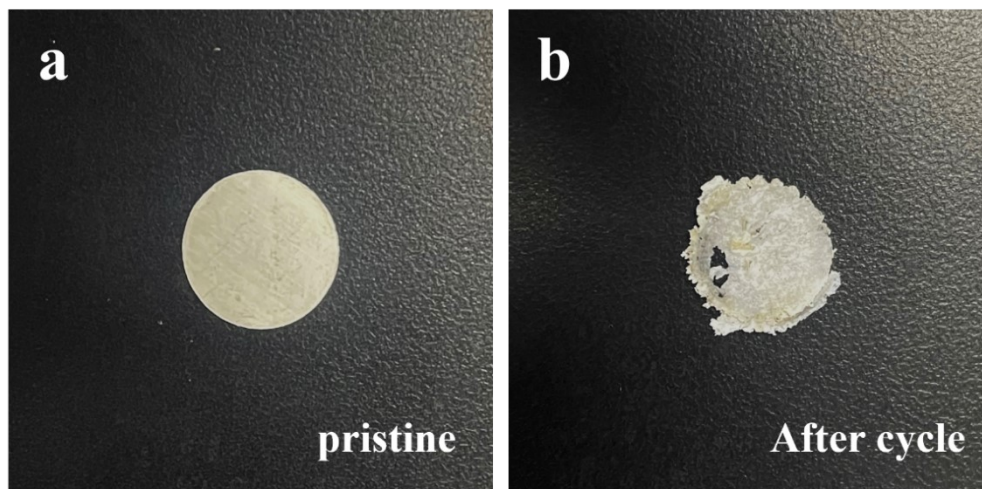

**Figure S29.** The optical photograph of Li foil (a) before cycling and (b) after operated in LCBs for 800 h.



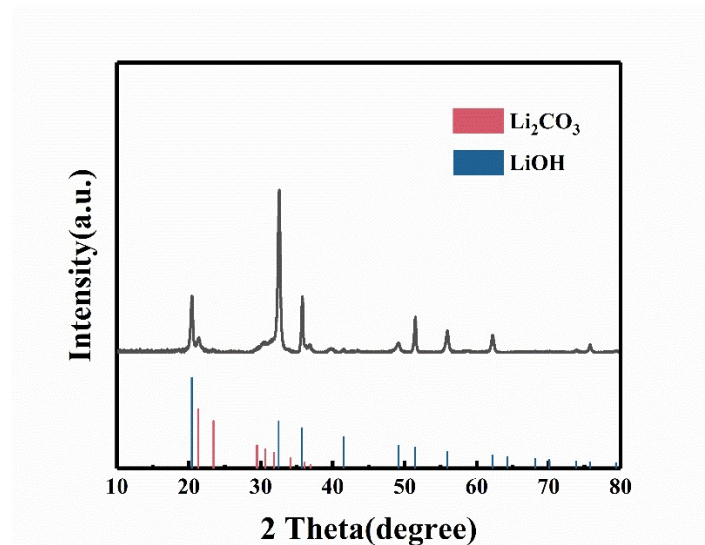

**Figure S30.** XRD spectra of Li foil after 800 h cycle.

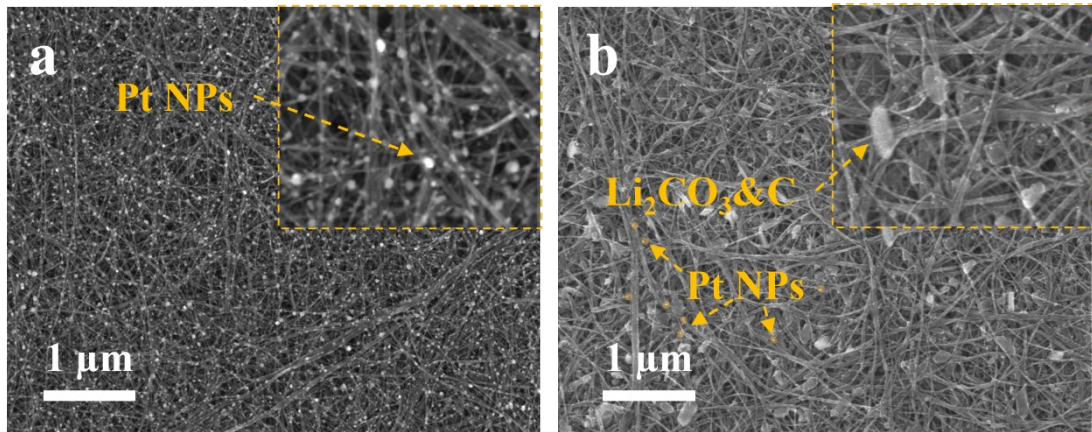

**Figure S31.** The SEM images of Pt@CNT electrode (a) before and (b) after discharge

**Table S2.** Electrochemical performance comparison of different reported Li-CO<sub>2</sub> batteries.

| Cathodes                                                                    | Overpotential                      | Energy efficiency                  | Discharge capacity                                     | Stability                               | Ref              |
|-----------------------------------------------------------------------------|------------------------------------|------------------------------------|--------------------------------------------------------|-----------------------------------------|------------------|
| <b>Pt@GCA</b>                                                               | 0.72 V at 20 $\mu\text{A cm}^{-2}$ | 82% at 20 $\mu\text{A cm}^{-2}$    | 10.03 mAh $\text{cm}^{-2}$ at 20 $\mu\text{A cm}^{-2}$ | > 91 cycles at 40 $\mu\text{A cm}^{-2}$ | <b>This Work</b> |
| <b>GCA</b>                                                                  | 2.15 V at 20 $\mu\text{A cm}^{-2}$ | 53.15% at 20 $\mu\text{A cm}^{-2}$ | 4.72 mAh $\text{cm}^{-2}$ at 20 $\mu\text{A cm}^{-2}$  | 45 cycles at 20 $\mu\text{A cm}^{-2}$   | <b>This Work</b> |
| Defect-rich porous carbon (c-p-MOF-5)                                       | 1.25 V at 0.1 A $\text{g}^{-1}$    | N/A                                | 22000 mAh $\text{g}^{-1}$ at 0.5 A $\text{g}^{-1}$     | 540 h at 0.5 A $\text{g}^{-1}$          | 1                |
| Ru/NS-G                                                                     | 1.40 V at 0.02 mA $\text{cm}^{-2}$ | N/A                                | 2.49 mAh $\text{cm}^{-2}$ at 20 $\mu\text{A cm}^{-2}$  | 100 cycles at 100 mA $\text{g}^{-1}$    | 2                |
| CoSe <sub>2</sub> carbonized melamine foam                                  | 0.72 V at 0.05 mA $\text{cm}^{-2}$ | 81.5% at 0.05 mA $\text{cm}^{-2}$  | 5.62 mAh $\text{cm}^{-2}$ at 0.05 mA $\text{cm}^{-2}$  | 162 cycles at 20 $\mu\text{A cm}^{-2}$  | 3                |
| NiFe@NC/PPC                                                                 | 1.08 V at 0.05 mA $\text{cm}^{-2}$ | N/A                                | 6.80 mAh $\text{cm}^{-2}$ at 0.05 mA $\text{cm}^{-2}$  | 109 cycles at 0.05 mA $\text{cm}^{-2}$  | 4                |
| Vs-Co <sub>2</sub> CuS <sub>4</sub>                                         | 0.73 V at 20 $\mu\text{A cm}^{-2}$ | 80.3% at 20 $\mu\text{A cm}^{-2}$  | 1.95 mAh $\text{cm}^{-2}$ at 20 $\mu\text{A cm}^{-2}$  | 600 h at 20 $\mu\text{A cm}^{-2}$       | 5                |
| Bi <sub>0.5</sub> Na <sub>0.5</sub> TiO <sub>3</sub> nanorods piezoelectric | 1.00 V at 0.01 mA $\text{cm}^{-2}$ | N/A                                | 1.37 mAh $\text{cm}^{-2}$ at 0.01 mA $\text{cm}^{-2}$  | 100 h at 0.01 mA $\text{cm}^{-2}$       | 6                |
| Porous carbon C/CoNi-CNTs                                                   | 1.47 V at 0.05 mA $\text{cm}^{-2}$ | N/A                                | 3.24 mAh $\text{cm}^{-2}$ at 0.05 mA $\text{cm}^{-2}$  | 100 cycles at 0.05 mA $\text{cm}^{-2}$  | 7                |
| Copper indium sulfide (CIS)                                                 | 1.00 V at 20 $\mu\text{A cm}^{-2}$ | ~80% at 20 $\mu\text{A cm}^{-2}$   | 8.88 mAh $\text{cm}^{-2}$ at 20 $\mu\text{A cm}^{-2}$  | 105 cycles at 20 $\mu\text{A cm}^{-2}$  | 8                |
| TiVC/graphene aerogel                                                       | 1.50 V at 200 mA $\text{g}^{-1}$   | ~65% at 200 mA $\text{g}^{-1}$     | 27 880 mAh $\text{g}^{-1}$ at 100 mA $\text{g}^{-1}$   | 91 cycles at 100 mA $\text{g}^{-1}$     | 9                |
| N, O-doped graphene aerogel                                                 | 1.00 V at 20 $\mu\text{A cm}^{-2}$ | 78.46% at 20 $\mu\text{A cm}^{-2}$ | 18.69 mAh $\text{cm}^{-2}$ at 20 $\mu\text{A cm}^{-2}$ | 151 cycles at 20 $\mu\text{A cm}^{-2}$  | 10               |
| Co-doped CeO <sub>2</sub> /graphene aerogel                                 | 1.25 V at 100 mA $\text{g}^{-1}$   | N/A                                | 7860 mAh $\text{g}^{-1}$ at 100 mA $\text{g}^{-1}$     | 100 cycles at 100 mA $\text{g}^{-1}$    | 11               |

|                                                                           |                                       |                                     |                                                             |                                         |    |
|---------------------------------------------------------------------------|---------------------------------------|-------------------------------------|-------------------------------------------------------------|-----------------------------------------|----|
| NiS <sub>2</sub> /FeS <sub>2</sub> -N, S,<br>Co-doped graphene<br>aerogel | 1.10 V at 100 mA<br>g <sup>-1</sup>   | 71.50% at<br>200 mA g <sup>-1</sup> | 21178 mAh<br>g <sup>-1</sup> at 300 mA<br>g <sup>-1</sup>   | 127 cycles at<br>100 mA g <sup>-1</sup> | 12 |
| Pt/N-doped<br>polypyrrole CNT                                             | 0.75 V at 100 mA<br>g <sup>-1</sup>   | N/A                                 | 29614 mAh<br>g <sup>-1</sup> at 100 mA<br>g <sup>-1</sup>   | 30 cycles at<br>100 mA g <sup>-1</sup>  | 13 |
| Pt@CNT                                                                    | 1.86 V at 100 mA<br>g <sup>-1</sup>   | 70 % at 100<br>mA g <sup>-1</sup>   | N/A                                                         | 110 cycles at<br>100 mA g <sup>-1</sup> | 14 |
| Ru@CNT                                                                    | 1.39 V at 20 μA<br>cm <sup>-2</sup>   | N/A                                 | 4.62 mAh<br>cm <sup>-2</sup> at 20 μA<br>cm <sup>-2</sup>   | 100 cycles at<br>20 μA cm <sup>-2</sup> | 15 |
| TiO <sub>2</sub> nanorod<br>arrays/<br>sponge                             | 1.02 V at 0.05 mA<br>cm <sup>-2</sup> | N/A                                 | 4.38 mAh<br>cm <sup>-2</sup> at 0.05<br>mA cm <sup>-2</sup> | 1600 h at<br>0.05 mA cm <sup>-2</sup>   | 16 |

---

## Reference

1. J. Han, H. Wu, R. Song, W. Mao, D. Wang and D. Liu, *Electrochim. Acta*, 2024, **477**, 143779.
2. Y. Qiao, J. Wu, J. Zhao, Q. Li, P. Zhang, C. Hao, X. Liu, S. Yang and Y. Liu, *Energy Storage Mater.*, 2020, **27**, 133-139.
3. K. Wang, L. Liu, D. Liu, Y. Wei, Y. Liu, X. Wang, A. S. Vasenko, M. Li, S. Ding, C. Xiao and H. Pan, *Small*, 2024, **20**, e2310530.
4. H. Liang, Y. Zhang, F. Chen, S. Jing, S. Yin and P. Tsiakaras, *Appl. Catal., B*, 2019, **244**, 559-567.
5. B. Lu, B. Chen, D. Wang, C. Li, R. Gao, Y. Liu, R. Mao, J. Yang and G. Zhou, *Proc. Natl. Acad. Sci.*, 2023, **120**, e2216933120.
6. S. L. Tian, M. L. Li, L. M. Chang, W. Q. Liu and J. J. Xu, *J Colloid Interface Sci*, 2024, **656**, 146-154.
7. X. Ji, Y. Liu, Z. Zhang, J. Cui, Y. Fan and Y. Qiao, *J Colloid Interface Sci*, 2024, **655**, 693-698.
8. L. Chen, J. Zhou, J. Zhang, G. Qi, B. Wang and J. Cheng, *Energy Environ. Mater.*, 2023, **6**, e12415.
9. W. Zhao, Y. Yang, Q. Deng, Q. Dai, Z. Fang, X. Fu, W. Yan, L. Wu and Y. Zhou, *Adv.Funct.Mater.*, 2022, **33**, 2210037.
10. W. Yu, L. Liu, Y. Yang, N. Li, Y. Chen, X. Yin, J. Niu, J. Wang and S. Ding, *Chem. Eng. J.*, 2023, **465**, 142787.
11. Q. Deng, Y. Yang, S. Qu, W. Wang, Y. Zhang, X. Ma, W. Yan and Y. Zhang, *Energy Storage Mater.*, 2021, **42**, 484-492.
12. Y. Jin, Y. Liu, L. Song, J. Yu, K. Li, M. Zhang and J. Wang, *Chem. Eng. J.*, 2022, **430**, 133029.
13. Z. Chen, M. Yuan, Z. Tang, H. Zhu and G. Zeng, *Phys Chem Chem Phys*, 2023, **25**, 7662-7668.
14. P.-F. Zhang, T. Sheng, Y. Zhou, Y.-J. Wu, C.-C. Xiang, J.-X. Lin, Y.-Y. Li, J.-T. Li, L. Huang and S.-G. Sun, *Chem. Eng. J.*, 2022, **448**, 137541.
15. S. Thoka, C. M. Tsai, Z. Tong, A. Jena, F. M. Wang, C. C. Hsu, H. Chang, S. F. Hu and R. S. Liu, *ACS. Appl. Mater. Interfaces.*, 2021, **13**, 480-490.
16. X.-X. Wang, G.-J. Ji, P. She, F. Li, Q.-C. Liu, H.-F. Wang and J.-J. Xu, *Chem. Eng. J.*, 2021, **426**, 131101.
